# Supplementary material for: Structure and function of the metagenomic plastic-degrading polyester hydrolase PHL7 bound to its product
Source: PubMed Central journal article supplement (PMC10076380; doi:10.1038/s41467-023-37415-x), 2023-04-05
Supplement: 41467_2023_37415_MOESM1_ESM.pdf [file 41467_2023_37415_MOESM1_ESM.pdf]

## Supplementary Information

### **Structure and function of the metagenomic plastic-degrading polyester hydrolase PHL7 bound to its product**

P. Konstantin Richter<sup>1</sup>, Paula Blázquez-Sánchez<sup>2</sup>, Ziyue Zhao<sup>2</sup>, Felipe Engelberger<sup>3</sup>, Christian Wiebeler<sup>2,4</sup>, Georg Künze<sup>3</sup>, Ronny Frank<sup>5</sup>, Dana Krinke<sup>5</sup>, Emanuele Frezzotti<sup>6</sup>, Yulia Lihanova<sup>2</sup>, Patricia Falkenstein<sup>2</sup>, Jörg Matysik<sup>2</sup>, Wolfgang Zimmermann<sup>2\*</sup>, Norbert Sträter<sup>1\*</sup>, Christian Sonnendecker<sup>2\*</sup>

<sup>1</sup> Institute of Bioanalytical Chemistry, Centre for Biotechnology and Biomedicine, Leipzig University, 04103 Leipzig (Germany)

<sup>2</sup> Institute of Analytical Chemistry, Leipzig University, 04103 Leipzig (Germany)

<sup>3</sup> Institute for Drug Discovery, Leipzig University Medical School, 04107 Leipzig (Germany)

<sup>4</sup> Wilhelm-Ostwald-Institute for Physical and Theoretical Chemistry, Leipzig University, 04103 Leipzig (Germany)

<sup>5</sup> Centre for Biotechnology and Biomedicine, Molecular Biological-Biochemical Processing Technology, Leipzig University, 04103 Leipzig (Germany)

<sup>6</sup> Department of Chemical Life and Environmental Sciences, University of Parma, 43121 Parma (Italy)

\*Corresponding authors: wolfgang.zimmermann@uni-leipzig.de, strater@bbz.uni-leipzig.de, christian.sonnendecker@uni-leipzig.de

## Supplementary Methods:

### Classical Molecular Dynamics

Molecular dynamics (MD) simulations of PHL7 (PDB [7NEI](#)) were carried out using AMBER20 along with the ff19SB force field<sup>1</sup> for protein atoms and the GAFF force field<sup>2</sup> for the EMT ligand atoms. The protonation state of the residues at pH 8.0 was estimated using the H++ server<sup>3</sup>. Then, the MD system was solvated with TIP3P water molecules and neutralized with counterions in a truncated octahedral box of 1.3 nm of padding with periodic boundary conditions. The system was first minimized using the steepest descent method with position restraints applied on waters and ions, followed by a second minimization without any position restraints. The system was heated from 0 to 298 K for 75 ps at a constant volume using a Langevin thermostat at 1 fs time step, followed by equilibration of the solvent and ligand atoms, of each system for 2.5 ns at 298 K with a restraint weight of 10 kcal/mol/Å<sup>2</sup> on all protein atoms at the constant pressure of 1 bar using a Berendsen barostat and a 2 fs time step. Subsequently, a similar equilibration step was performed with restraints applied only on the protein backbone atoms (2.5 ns at 2fs time step and a restraint weight of 10 kcal/mol/Å<sup>2</sup>) before the whole system was equilibrated for 2.5 ns under the same temperature and pressure conditions without restraints. Production MD runs were carried out in four replicas for 100 ns each, using a timestep of 2 fs and the SHAKE<sup>4</sup> algorithm to constrain all bonds involving hydrogens. The particle mesh Ewald method<sup>5</sup> was used for long-range electrostatics, with a 10 Å cutoff for short-range electrostatics. The geometry of EMT was optimized with Gaussian 09 (Gaussian, Inc, Wallingford CT) on the B3LYP/6–31G\*\* level of theory, and assignment of AMBER atom types and calculation of RESP charges were done with Antechamber<sup>6</sup>. Independent runs were ensured by using random seeds for initial velocities during the equilibration step. Replicas were checked for structural convergence using the overall backbone root-mean-square deviation (RMSD) relative to the first frame. RMSD and per-residue root mean square fluctuations (RMSF) were calculated using CPPTRAJ of AmberTools22<sup>7</sup>. Distance analysis was conducted using MDAnalysis<sup>8</sup> and Matplotlib (Matplotlib: A 2D Graphics Environment | IEEE Journals & Magazine) to generate figures.

### Autodock VINA

Control docking calculations were carried out following Engelberger et al.<sup>9</sup> using AutoDock Vina<sup>10,11</sup>. For all variants docking was performed inside a volume of 11 × 27 × 11 grid points (1Å spacing between grid points) that comprises both subsites I and II. We used the same starting structures that were employed for Rosetta docking. We added the polar hydrogens for the protein and parameterized the system with Gasteiger charges and atom types using prepare\_receptor4.py and prepare\_ligand4.py scripts from MGLtools 1.5.7.

### DiffDock

The DiffDock<sup>12</sup> machine learning model was used to predict the binding mode of a pentamer of PET. To generate the prediction we used as input the following smiles string:



## Supplementary Tables:

**Supplementary Table 1:** Overview of point mutations introduced into PHL7.

| position | functional location   | target AA | reference protein        | reference | G-PET weight loss (%) <sup>1</sup> |             |                   | $\Delta T_m \pm SD$ (rel. to WT PHL7) |
|----------|-----------------------|-----------|--------------------------|-----------|------------------------------------|-------------|-------------------|---------------------------------------|
|          |                       |           |                          |           | 4 h                                | 8 h         | 16 h              |                                       |
| - (WT)   | -                     | -         | -                        | -         | 18.5 ± 1.00                        | 40.8 ± 6.10 | 90.1 ± 2.78       | 0.00 ± 0.05                           |
| S131     | catalytic nucleophile | A         | -                        | -         | n.d. <sup>2</sup>                  | n.d.        | n.d.              | -0.63 ± 0.04                          |
| F63      | subsite I             | Y         | <i>IsPETase</i> , LCC    | 16,17     | 18.4 ± 0.75                        | 29.0 ± 0.71 | 83.0 ± 0.92       | 0.56 ± 0.04                           |
|          |                       | A         | <i>IsPETase</i> , LCC    | 16,17     | 3.0 ± 0.16                         | 6.7 ± 0.16  | 10.8 ± 0.12       | 0.07 ± 0.05                           |
| M132     | subsite I             | W         | PHL4                     | 14        | n.d.                               | n.d.        | 2.9 ± 0.38 (24 h) | 1.98 ± 0.17                           |
| L93      | subsite I             | F         | LCC                      | 17        | 22.7 ± 0.89                        | 50.2 ± 1.64 | 97.6 ± 2.00       | 1.19 ± 0.04                           |
|          |                       | A         | -                        | -         | 19.7 ± 0.58                        | 45.4 ± 0.78 | 92.0 ± 2.17       | -0.44 ± 0.04                          |
| Q95      | subsite I             | Y         | LCC                      | 17        | 21.4 ± 0.68                        | 48.4 ± 0.37 | 94.6 ± 3.38       | 0.80 ± 0.05                           |
|          |                       | G         | LCC ICCG                 | 17        | 16.4 ± 1.34                        | 41.3 ± 1.03 | 67.7 ± 2.38       | 1.99 ± 0.04                           |
| H185     | subsite I             | S         | <i>IsPETase</i>          | 18        | 4.0 ± 0.16                         | 7.3 ± 0.36  | 10.0 ± 0.31       | -11.52 ± 0.05                         |
| F189     | subsite I             | I         | <i>IsPETase</i>          | 18        | 10.8 ± 0.49                        | 14.7 ± 0.34 | 14.7 ± 1.35       | -7.10 ± 0.07                          |
| H130     | subsite IIa           | W         | <i>IsPETase</i> , PHL4-6 | 14,18     | 4.8 ± 0.28                         | 8.1 ± 0.05  | 12.1 ± 0.18       | -4.40 ± 0.07                          |
| L210     | subsite IIa           | F         | LCC, <i>TfCut2</i>       | 17,19     | 12.9 ± 0.47                        | 28.0 ± 0.65 | 55.9 ± 2.16       | 3.05 ± 0.03                           |
|          |                       | I         | LCC ICCG                 | 17        | 25.0 ± 0.13                        | 52.9 ± 1.48 | 99.8 ± 0.33       | -0.51 ± 0.06                          |
|          |                       | A         | <i>IsPETase</i> , S238A  | 16,20     | 23.5 ± 0.94                        | 52.5 ± 1.31 | 98.0 ± 2.00       | 0.37 ± 0.02                           |
|          |                       | S         | <i>IsPETase</i>          | 16        | 20.8 ± 1.16                        | 46.1 ± 1.57 | 92.7 ± 3.34       | 0.91 ± 0.05                           |
|          |                       | V         | -                        | -         | 25.6 ± 0.58                        | 54.3 ± 1.33 | 100               | -0.21 ± 0.11                          |
|          |                       | T         | -                        | -         | 26.3 ± 0.74                        | 57.2 ± 1.54 | 100               | 1.36 ± 0.05                           |
| D233     | metal binding site    | K         | -                        | -         | 25.4 ± 4.25                        | 44.7 ± 6.02 | 97.6 ± 4.17       | 0.91 ± 0.10                           |

<sup>1</sup>: All weight loss experiments were conducted at 70 °C, mean values ± SD for n=3 experiments are shown.

<sup>2</sup>: No weight loss was detectable after 24 h.

**Supplementary Table 2:** Data collection and refinement statistics of the PHL7×TPA and PHL7×Mg<sup>2+</sup> crystal structures.

|                                        | PHL7×TPA                               | PHL7×Mg <sup>2+</sup>                  |
|----------------------------------------|----------------------------------------|----------------------------------------|
| <b>Data collection</b>                 |                                        |                                        |
| Resolution range [Å]                   | 21.57 - 1.7 (1.761 - 1.7) <sup>1</sup> | 21.46 - 1.7 (1.761 - 1.7) <sup>1</sup> |
| Space group                            | P2 <sub>1</sub>                        | P2 <sub>1</sub>                        |
| Wavelength [Å]                         | 1.5406                                 | 1.5406                                 |
| Temperature [K]                        | 100                                    | 100                                    |
| Unit cell dimensions a, b, c [Å]       | 52.91, 56.51, 101.74                   | 52.35, 56.07, 100.44                   |
| β [°]                                  | 94.11                                  | 94.01                                  |
| Reflections                            | 430,814 (32,577)                       | 312,141 (21,198)                       |
| Unique reflections                     | 66,097 (6,614)                         | 63,959 (6,341)                         |
| Multiplicity                           | 6.5 (4.9)                              | 4.9 (3.3)                              |
| Completeness (%)                       | 99.84 (99.97)                          | 99.77 (99.83)                          |
| I/σ(I)                                 | 18.33 (2.80)                           | 19.81 (3.02)                           |
| R <sub>merge</sub>                     | 0.07515 (0.4792)                       | 0.05707 (0.3389)                       |
| R <sub>pim</sub>                       | 0.0303 (0.2392)                        | 0.02696 (0.2168)                       |
| CC <sub>1/2</sub>                      | 0.998 (0.832)                          | 0.997 (0.838)                          |
| Wilson B-factor                        | 13.42                                  | 11.93                                  |
| <b>Refinement</b>                      |                                        |                                        |
| Reflections used in refinement         | 66,048 (6,612)                         | 63,957 (6,341)                         |
| Reflections used for R <sub>free</sub> | 2,978 (323)                            | 2,885 (319)                            |
| R <sub>work</sub>                      | 0.1600 (0.1972)                        | 0.1296 (0.1723)                        |
| R <sub>free</sub>                      | 0.2059 (0.2495)                        | 0.1604 (0.2103)                        |
| No. of non-hydrogen atoms:             |                                        |                                        |
| Protein                                | 4,978                                  | 4,852                                  |
| Solvent                                | 4,036                                  | 4,006                                  |
| Ligands                                | 910                                    | 832                                    |
| Ligands                                | 56                                     | 20                                     |
| RMS deviations                         |                                        |                                        |
| Bonds [Å]                              | 0.004                                  | 0.008                                  |
| Angles [°]                             | 0.77                                   | 0.96                                   |
| Ramachandran                           |                                        |                                        |
| Favored [%]                            | 98.05                                  | 98.25                                  |
| Allowed [%]                            | 1.95                                   | 1.75                                   |
| Outliers [%]                           | 0.00                                   | 0.00                                   |
| Molprobrity clashscore                 | 2.74                                   | 1.39                                   |
| Average B-factor                       |                                        |                                        |
| Protein                                | 18.27                                  | 16.60                                  |
| Solvent                                | 15.49                                  | 13.51                                  |
| Ligands                                | 30.35                                  | 31.32                                  |
| Ligands                                | 25.35                                  | 27.62                                  |
| No. of TLS groups                      | 2                                      | 2                                      |
| PDB ID                                 | <a href="#">8BRB</a>                   | <a href="#">8BRA</a>                   |

<sup>1</sup>: Values for highest resolution shell in parentheses.

**Supplementary Table 3.** Rank and score of Autodock Vina predictions and RMSD to the Rosetta predicted structure for each variant.

| Variant | AutodockVina Prediction Rank | Autodock Score | RMSD to Rosetta [Å] |
|---------|------------------------------|----------------|---------------------|
| L210A   | 8                            | -5.1           | 2.279               |
| L210F   | 2                            | -6.7           | 2.667               |
| L210I   | 5                            | -5.1           | 2.780               |
| L210S   | 5                            | -6.3           | 2.343               |
| L210T   | 4                            | -5             | 2.556               |
| L210V   | 5                            | -4.9           | 2.944               |
| WT      | 4                            | -5             | 2.773               |

**Supplementary Table 4.** Score of Autodock Vina for the nine docking structures predicted for each variant. The structure that most closely resembles the Rosetta prediction is marked in yellow.

| Variant | Autodock Prediction # | Autodock Score |
|---------|-----------------------|----------------|
| L210A   | 1                     | -5.7           |
| L210A   | 2                     | -5.5           |
| L210A   | 3                     | -5.4           |
| L210A   | 4                     | -5.3           |
| L210A   | 5                     | -5.1           |
| L210A   | 6                     | -5.1           |
| L210A   | 7                     | -5.1           |
| L210A   | 8                     | -5.1           |
| L210A   | 9                     | -5             |
| L210F   | 1                     | -6.8           |
| L210F   | 2                     | -6.7           |
| L210F   | 3                     | -6.7           |
| L210F   | 4                     | -6.6           |
| L210F   | 5                     | -6.5           |
| L210F   | 6                     | -6.4           |
| L210F   | 7                     | -6.4           |
| L210F   | 8                     | -6.3           |
| L210F   | 9                     | -6.3           |
| L210I   | 1                     | -5.4           |
| L210I   | 2                     | -5.3           |
| L210I   | 3                     | -5.2           |
| L210I   | 4                     | -5.2           |
| L210I   | 5                     | -5.1           |
| L210I   | 6                     | -5.1           |
| L210I   | 7                     | -5.1           |

|       |   |      |
|-------|---|------|
| L210I | 8 | -5   |
| L210I | 9 | -5   |
| L210S | 1 | -6.4 |
| L210S | 2 | -6.4 |
| L210S | 3 | -6.4 |
| L210S | 4 | -6.3 |
| L210S | 5 | -6.3 |
| L210S | 6 | -6.2 |
| L210S | 7 | -6.2 |
| L210S | 8 | -6.2 |
| L210S | 9 | -6.2 |
| L210T | 1 | -5.5 |
| L210T | 2 | -5.1 |
| L210T | 3 | -5   |
| L210T | 4 | -5   |
| L210T | 5 | -5   |
| L210T | 6 | -4.9 |
| L210T | 7 | -4.8 |
| L210T | 8 | -4.7 |
| L210T | 9 | -4.7 |
| L210V | 1 | -5.3 |
| L210V | 2 | -4.9 |
| L210V | 3 | -4.9 |
| L210V | 4 | -4.9 |
| L210V | 5 | -4.9 |
| L210V | 6 | -4.9 |
| L210V | 7 | -4.8 |
| L210V | 8 | -4.8 |
| L210V | 9 | -4.6 |
| WT    | 1 | -5.2 |
| WT    | 2 | -5.1 |
| WT    | 3 | -5   |
| WT    | 4 | -5   |
| WT    | 5 | -5   |
| WT    | 6 | -5   |
| WT    | 7 | -5   |
| WT    | 8 | -4.8 |
| WT    | 9 | -4.8 |

## Supplementary Figures:

|          |                                                                       |     |
|----------|-----------------------------------------------------------------------|-----|
| PHL7     | -----MANPYERGPDPTESSIEAVRGPFVA                                        | 26  |
| PHL4     | -----MENPYERGPDPPTQSVAAARGPYAVS                                       | 26  |
| LCC      | MDGVLWRVRTAALMAALLLAWALVWASPSVEAQSNPYQRGNPTRSALTADG-PFSVA             | 59  |
| TfCut2   | -----ANPYERGNPTDALLEARSGBPFSVS                                        | 25  |
| IsPETase | -----MNFPRASRLMQAAVLGGLMAVSAATAQTNPYARGPNPTAASLEASAGPFTVR             | 53  |
|          | *** **:* ** : * ** :*                                                 |     |
| PHL7     | QTTVSRQLQADGFGGGTIYYPTDTSQGTFGAVAI SPGFTAGQESIAWLGPRIASQGFVVIT        | 86  |
| PHL4     | QITVG-GQFGSYSGGTIYYPTSTADGKFGAVAIAPGFLSFQSSVAWLGPRIASQGFVVM           | 85  |
| LCC      | TYTVSRLSVSGFGGGVIYYPTG-TSLTFGGIAMSPGYTADASSLAWLGRRLASHGFVVLV          | 118 |
| TfCut2   | EENVSRLSASGFGGGTIYYPR--ENNTYGAVAISPYTGTEASIAWLGERIASHGFFVIT           | 83  |
| IsPETase | SFTVS--RPSGYGAGTVYYPTN-AGGTVGAIAIVPGYTARQSSIKWWGPRLASHGFVVIT          | 110 |
|          | .*. ....*:* ** . *: * ** : * : * * * : * : * : * : * : *              |     |
| PHL7     | IDTITRLDQPSRGRQLQAALDHLRTN----SVVRNRIDPNRMVAVMCHSMGGGALSAA            | 141 |
| PHL4     | IDTGTIFDQPAQRGDQLLDALDFLTQR----SSVKDRIDPNRLAVAGWISGGGGSLEAA           | 140 |
| LCC      | INTNSRFDQPSRASQLSAALNYLRTSS--PSAVRARLDANRLAVAGHSMGGGGTLRIA            | 175 |
| TfCut2   | IDTITRLDQPSRAEQLNALNHMINRA---SSTVRSRIDSSRLAVMCHSMGGGSLRLA             | 140 |
| IsPETase | IDTNSTLDQPSRSSQMAALRQVASLNGTSSSPIYGVDTARMGMVCHSMGGGSLISA              | 170 |
|          | *:* : * * . * * ** : * : : * . * : * * * * * : * * *                  |     |
| PHL7     | ANNTSLEAAIPLQGWHTRKNWSSVRTPTLVVGAQLDTIAPVSSHSEAFYNSLPDLKAY            | 201 |
| PHL4     | ADRPSLKAAPMAGWNLNTNWSRLTTPVLVVGVQNDLIAPVAMHSEFFYNSIRS--EKAY           | 198 |
| LCC      | EQNPSLKAAPLTPHHTDKTFN-TSVPVLIVGAEADTVAPVSHAIFFYQNLPSPTPKVY            | 234 |
| TfCut2   | SQRPLKAAIPTTPHLKNWSSVTVPTLIIGADLDTIAPVATHAKFFYNSLPSSISKAY             | 200 |
| IsPETase | ANNPSLKAAPQAPWDSSSTNFSSVTVPTLIFACENDSIAPVNSALPTIDMSMRN-AKQF           | 229 |
|          | : . . . * : * * . . . . . * . * . . . : * : * * * : : * : . . . * : * |     |
| PHL7     | MELRGASHIVSNTPD---TTTAKYSIAWLKRFVDDDLRYEQFLCPAP-DDFAISEYRSTCPF--      | 259 |
| PHL4     | LELAGGSHFTVTSAN---TPQAKLMSWLKRFVNDTRYEQFCIPGSPRGFSVSEYRSTCPY--        | 257 |
| LCC      | VELDNASHFAPNSNN---AAISVYTISSWMLKLVNDTRYRQFLCNVNDPALSDFRNTNHRHC--      | 293 |
| TfCut2   | LELDGATHFAPNIPN---KIIGKYSVAWLKRFVNDTRYTQFLCPCGPRDGLFGEVEEYRSTCPF      | 261 |
| IsPETase | LEINGGSHSCANSGNSQALIGKKGVAMKRFMDNDTRYSTFACENPNSTRVSDFRNTANCS---       | 290 |
|          | : * : . . . * . . . : . . . : * * * : * : * * * * * *                 |     |

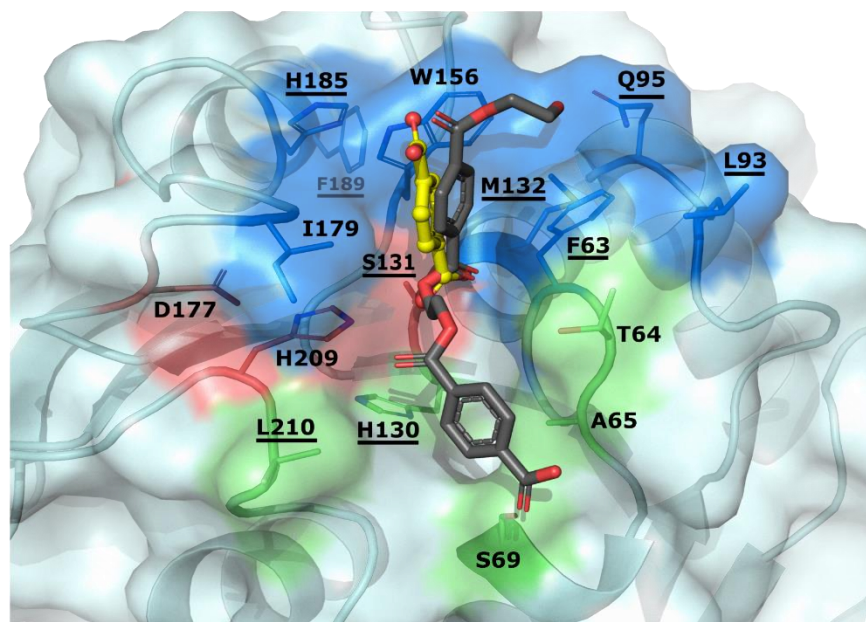

**Supplementary Figure 1:** Overview of the sites mutated in this study and origin of the chosen replacement residues. A multiple sequence alignment shows the corresponding positions (boxed) selected for mutagenesis and the amino acids to which those positions were mutated (filled residues). The catalytic triad is shown in red, subsite I in blue, subsite II in green (PHL7 residue numbering). A structural overview of the binding site with the docking model for EMT generated in this study (dark grey) is shown below. Mutation sites are underlined. Superposition of the TPA ligand (yellow) derived from the PHL7×TPA crystal structure (PDB:[8BRB](#)) confirms a productive conformation of the docked EMT molecule.



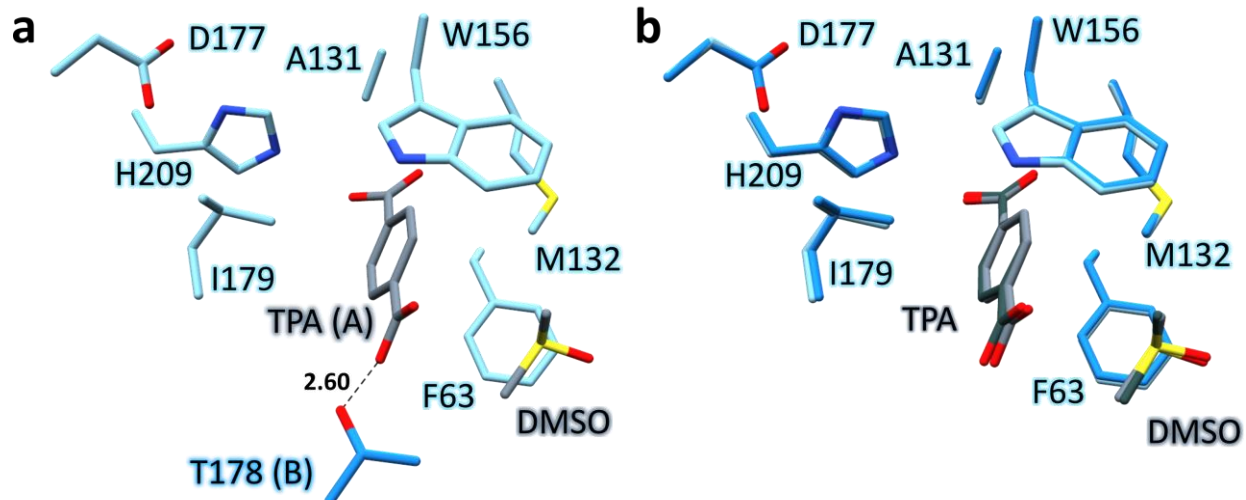

**Supplementary Figure 1:** Binding of TPA and DMSO to subsite I of PHL7. **a** T178 of chain B (dark blue) interacts with the distal carboxyl group of TPA (grey, distance in Å). **b** Superimposition of the two individual PHL7 chains A (light blue) and B (dark blue) of the PHL7×TPA cocrystal structure. Both the residues as well as the ligands TPA and DMSO (chain A: light grey, chain B: dark grey) align well. Therefore, interaction of T178 of chain B with TPA of chain A does not influence the conformation of the active site.

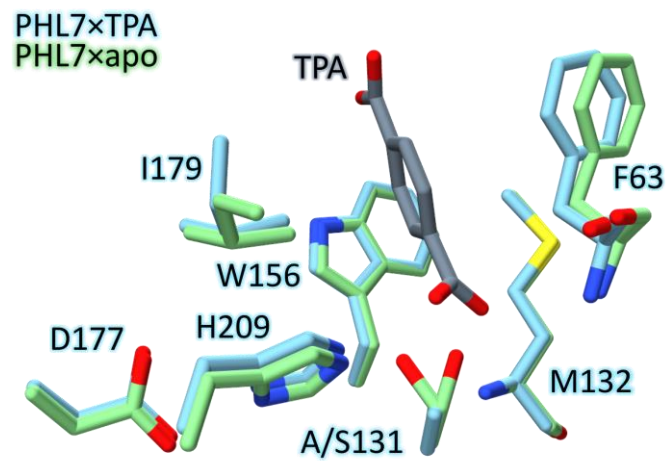

**Supplementary Figure 2:** Superimposition of subsite I of PHL7×TPA (light blue) and apo PHL7 (light green, PDB ID: [7NEI](#)). Binding of TPA does not significantly alter the conformation of binding residues.

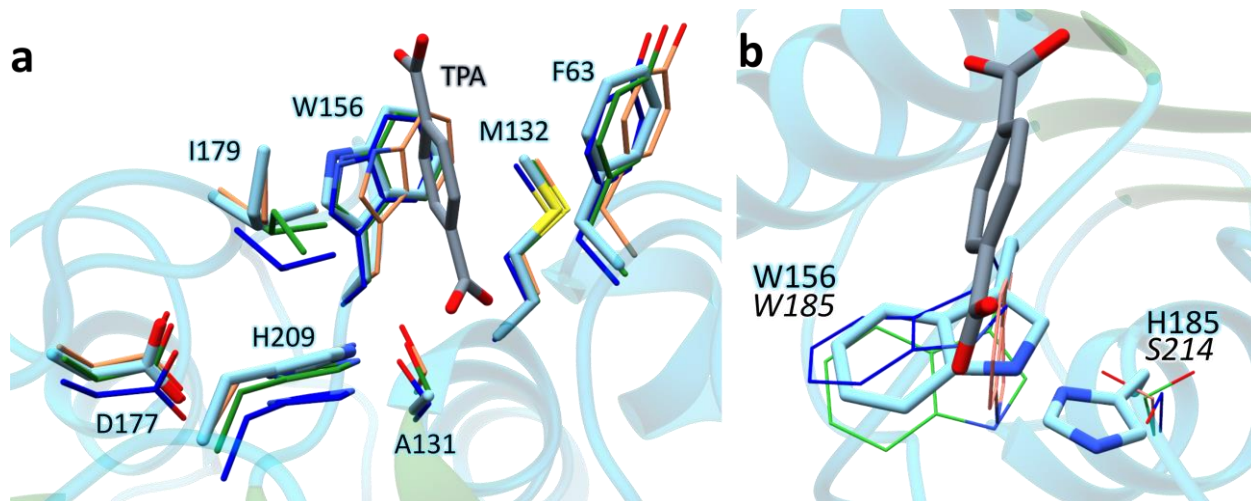

**Supplementary Figure 3:** Comparison of the subsite I architecture between PHL7, LCC and *IsPETase*. **a** Superimposition of subsite I of PHL7×TPA (light blue, TPA in grey) with apo structures of the homologous polyester hydrolases LCC (blue, PDB ID: [4EB0](#)), *IsPETase* (salmon, PDB ID: [5XJH](#)) and *TfCut2* (green, [4CG1](#)). The conformations of structurally equivalent residues are well conserved among these enzymes. *IsPETase* as a mesophilic polyester hydrolase deviates most significantly from the other enzymes that all belong to the thermophilic group. The residues of PHL7 are labeled accordingly. **b** Superimposition of PHL7×TPA (light blue, TPA in dark grey) and *IsPETase* (PDB ID: [5XGO](#), thin sticks). W185 as part of the subsite I  $\pi$ -stacking clamp of *IsPETase* adopts three distinct conformations, one in each individual molecule of the asymmetric unit (chain A: salmon; B: light green; C: blue), accompanied by different conformations of the neighboring S214. This conformational flexibility is restricted for the structurally equivalent W156 of PHL7 due to the neighboring H185. PHL7 W156 adopts a conformation most similar to conformation C of *IsPETase*. Exchange of H185S in PHL7 decreases both thermal stability and PET degradation activity.

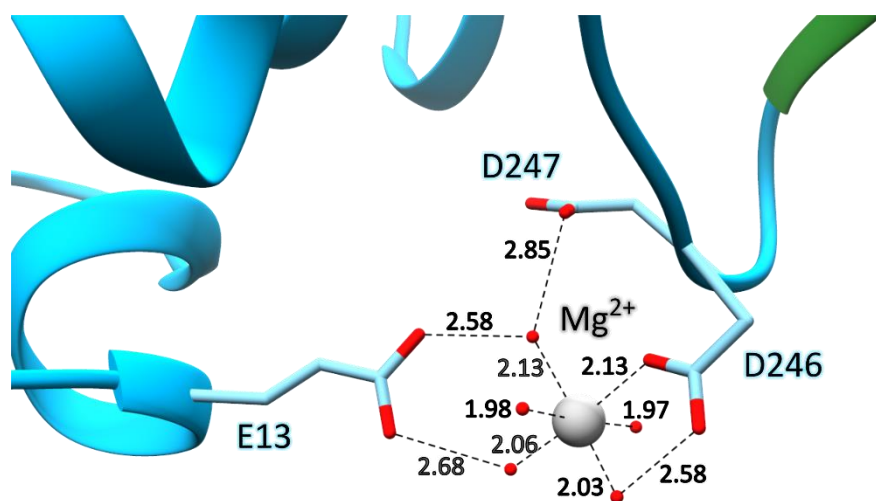

**Supplementary Figure 5:** Magnesium binding site of PHL7×Mg<sup>2+</sup>. The carboxylic sidechain of D246 and five water molecules complex a Mg<sup>2+</sup> ion in the first interaction sphere. Three of the five water molecules in

turn interact with the carboxylic sidechains of E13, D246 and D247, respectively. The binding site is  $\sim 28$  Å away from the active site. All distances in Å.

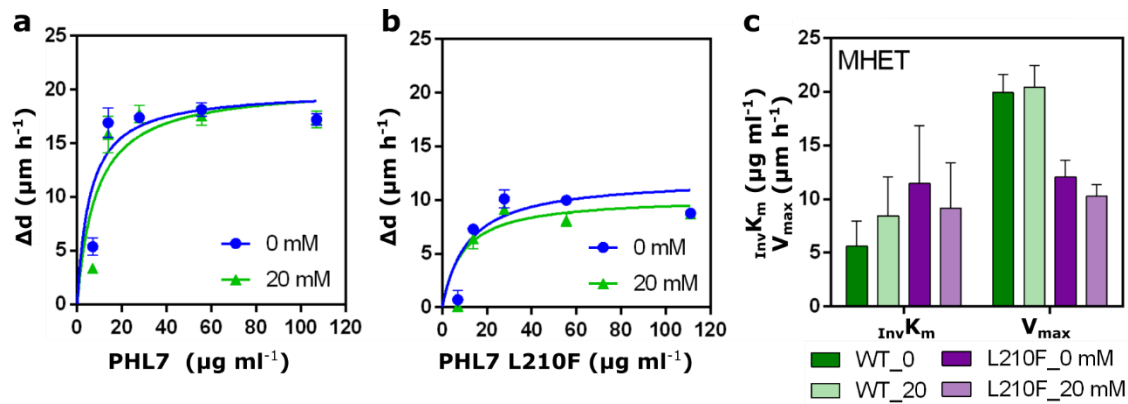

**Supplementary Figure 6:** Inhibition effect of MHET on PHL7 WT **a** and variant L210F **b**. The reaction rate is specified as reduction of the apparent film thickness per hour, which was measured by impedance spectroscopy<sup>15</sup>. An inverse Michaelis-Menten kinetic experiment was performed ranging from enzyme concentrations of 6.8 to 111  $\mu\text{g ml}^{-1}$  and an inhibitor concentration of 20 mM MHET was tested. **c**: Calculated  $\text{Inv}K_m$  and  $V_{\text{max}}$  values for the WT and variant L210F with 0 and 20 mM MHET.  $\text{Inv}K_m$  describes the enzyme concentration at half-maximum reaction velocity. Mean values for  $n=3$  replicates  $\pm$  SD are shown.

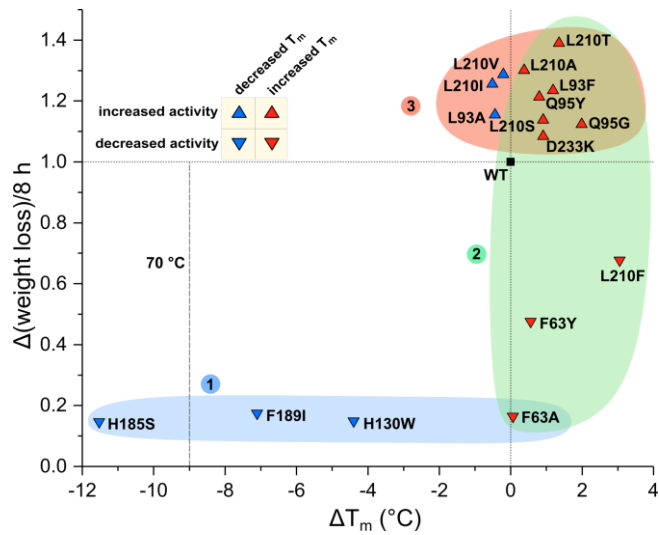

**Supplementary Figure 7:** Single mutants sorted by their melting point and their hydrolytic PET weight loss activity relative to PHL7 WT (black square). The triangles are color-coded ( $T_m$  decrease in blue, increase in red) and point upwards (increased weight loss activity) or downwards (decreased activity). The enzyme variants comprise three distinct classes: 1) drastically decreased activity and retained or decreased thermal stability (blue area), 2) increased thermal stability with varying activity (green) and 3) increased activity while maintaining or increasing thermal stability (red). Especially the red-green overlapping region contains double-gain variants interesting for further protein engineering. The optimal reaction temperature of 70 °C (which also resembles  $T_g$  of PET) is depicted with a dashed line.

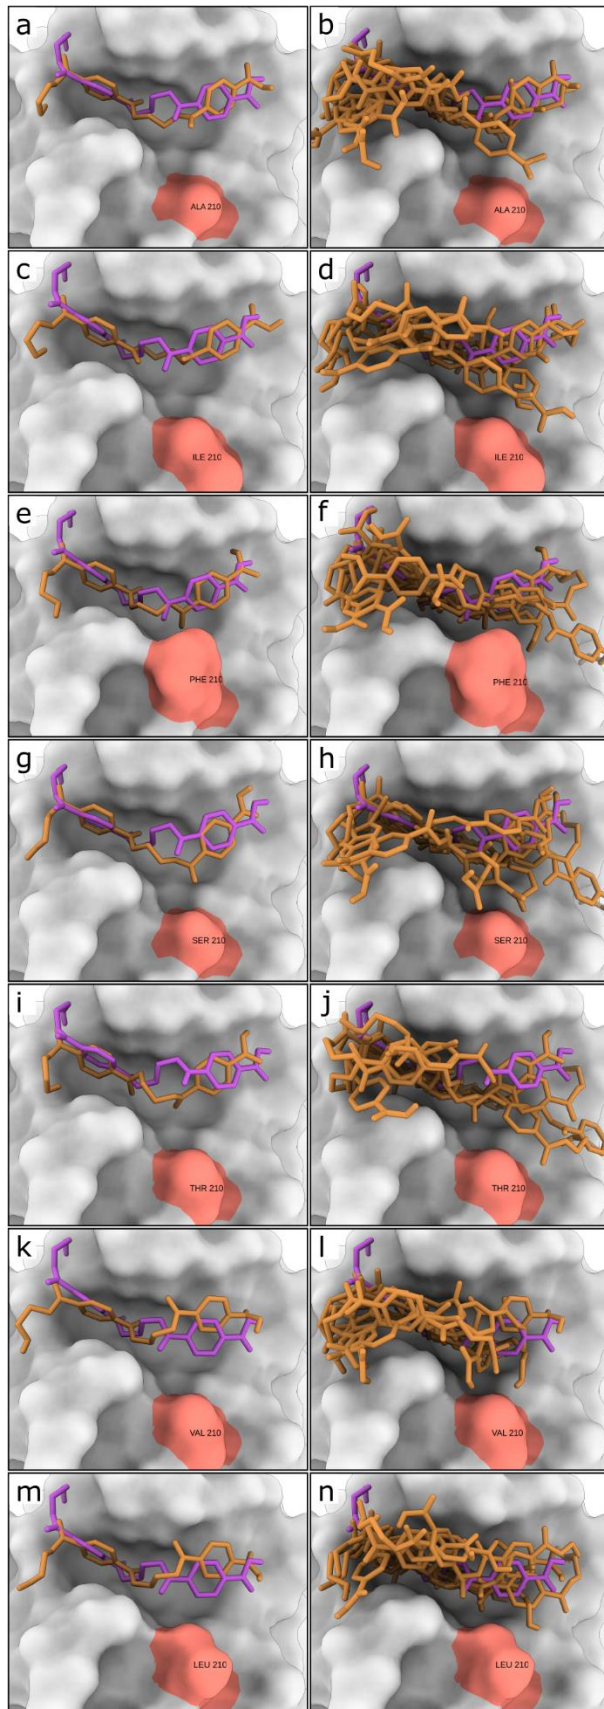

**Supplementary Figure 8:** Results of AutodockVina control docking calculations. Panel **a, c, e, g, i,** and **k** correspond to L210A, L210I, L210F, L210S, L210T, L210V, and WT, respectively. The EMT ligand lowest energy structure of Rosetta's most populated cluster is depicted in purple sticks. Shown in orange is Autodock's structurally closest prediction to Rosetta. As a comparison on the right column, panel **b, d, f, h, j, l,** and **n** correspond to an overlay of the nine predicted poses created with Autodock Vina.



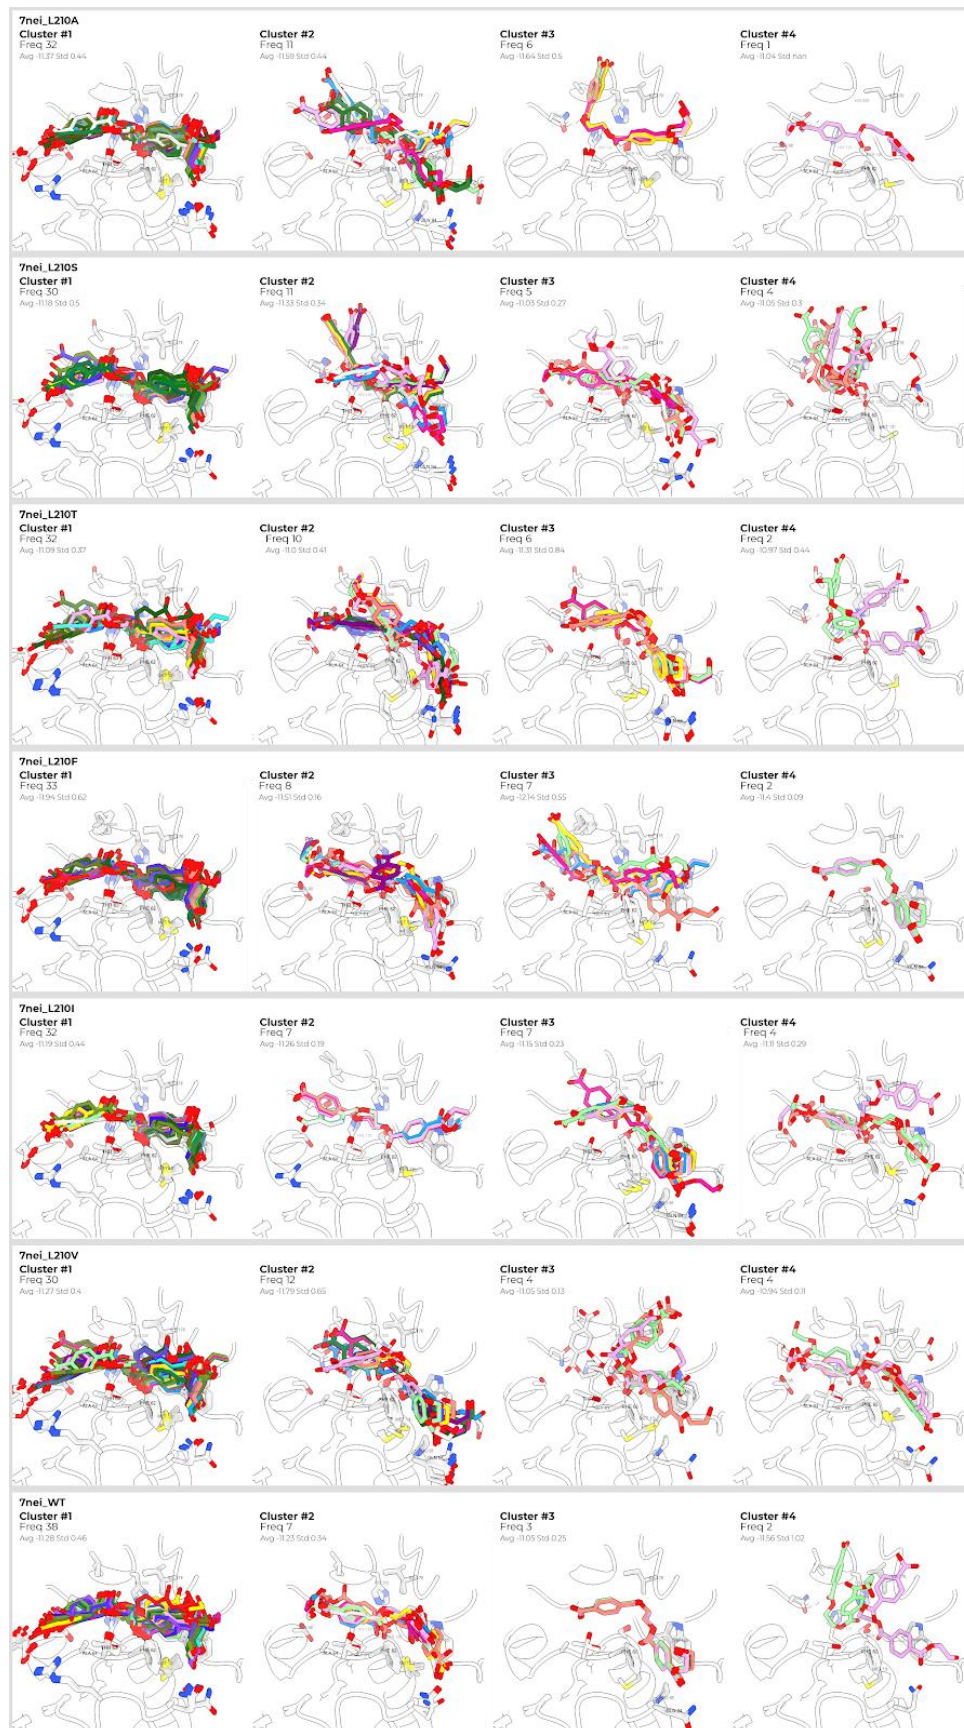



**Supplementary Figure 9:** Overview of the largest molecule clusters of the 50 best energy docking models of EMT for each L210X variant tested. The model with the most likely lowest energy binding mode was selected from the largest model cluster, which is displayed on the left-hand column and contained 60-76% of the top 50 docking poses (from 40'000 generated poses in total). The Rosetta interface\_delta\_X score was used to estimate the energy of interaction. At the same time, each most populated cluster was aligned with the TPA crystallographic structure ([8BRB](#)) to confirm that its terephthalic ring resembled the same orientation and position. Furthermore, it is important to note that our method was able to identify alternative binding modes that have lower abundance but slightly better interface\_delta\_X scores in some cases (e.g. cluster #3 WT).

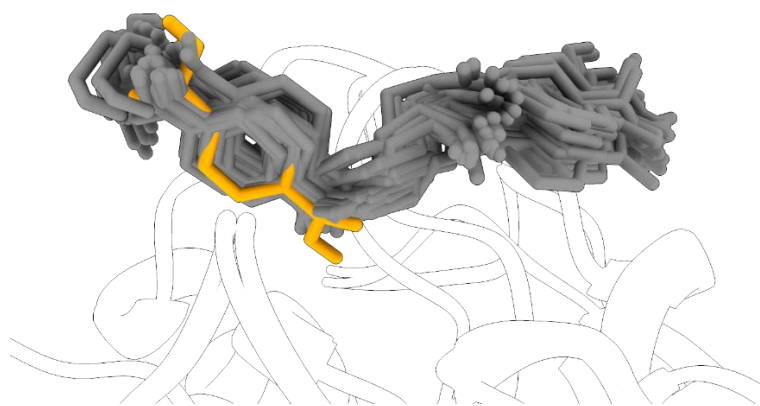

**Supplementary Figure 10.** Docking poses of EMT in PHL7 overlaid with the crystallized TPA molecule in PHL7. Aromatic rings of EMT molecules (gray sticks) from cluster #1 superimpose clearly with the aromatic ring of TPA (yellow sticks) bound to the crystal structure of PHL7×TPA ([8BRB](#)).

**A**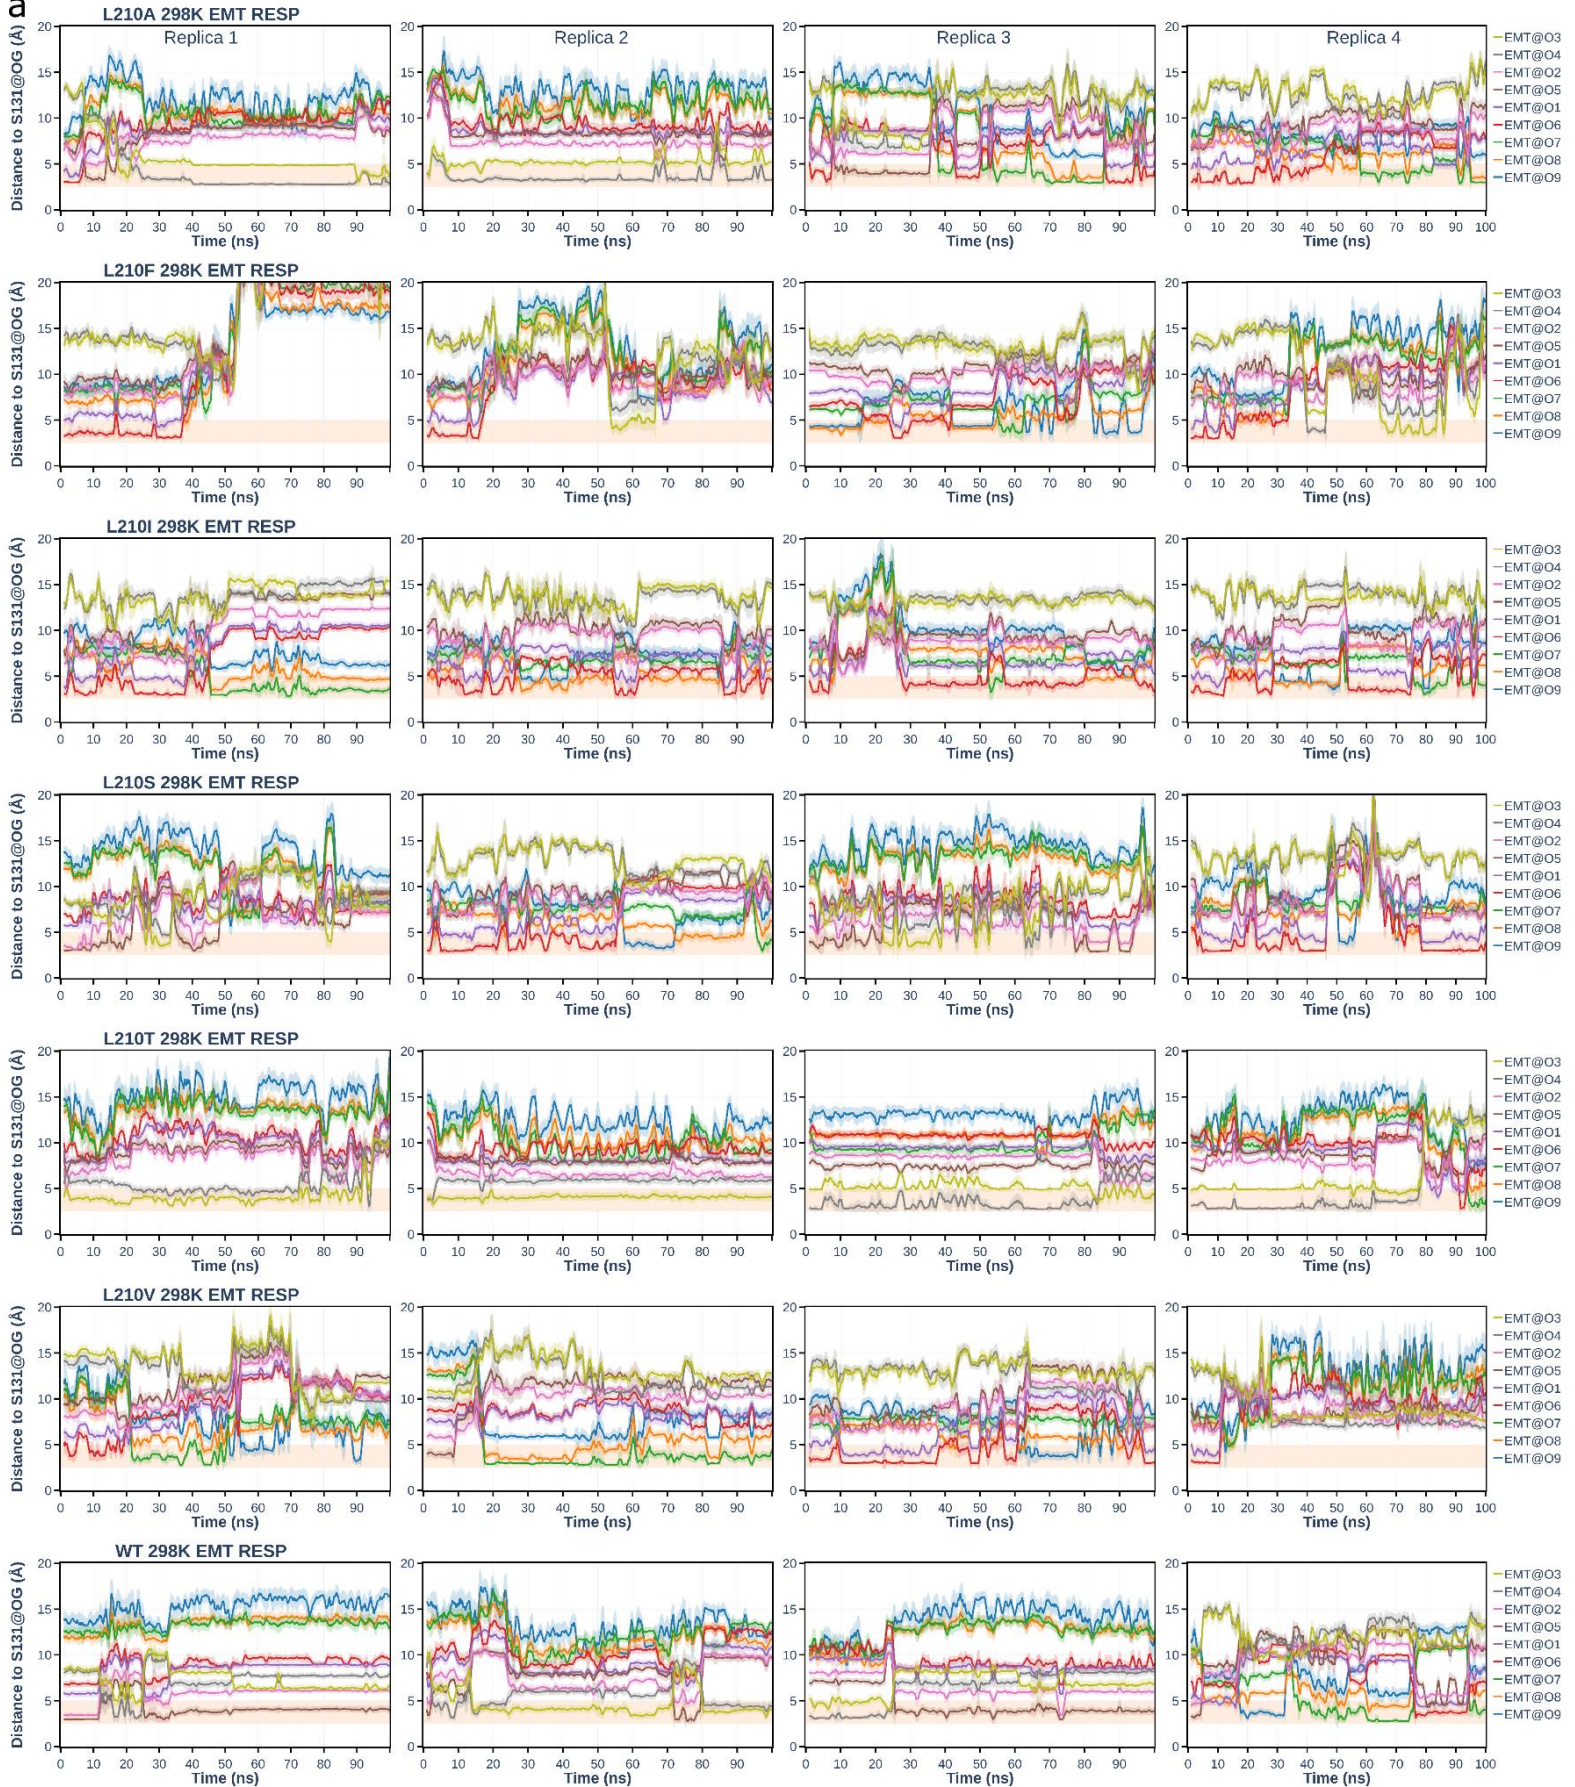

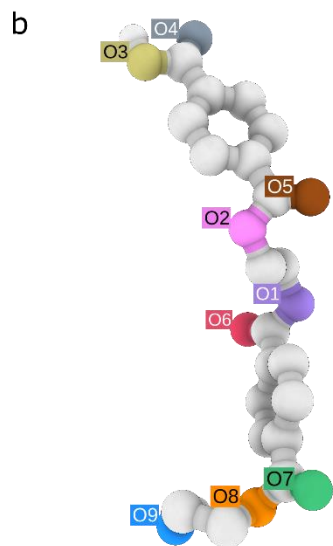

**Supplementary Figure 11.** MD simulation results for PHL7-EMT docking model. **a** Distance between the oxygens of the EMT molecule and the  $\gamma$ -oxygen of the catalytic serine (S131) over the simulation time (100 ns) for each L210X variant and the WT. For every 100 frames of the simulation the mean distance and SD were calculated. The distance considered as catalytically competent (2.5 - 5 Å) is marked as a light orange band. The S131  $\gamma$ -oxygen is hydrogen-bonded with at least on oxygen of EMT over the entire time course in every MD simulation, except in two replicates for L210F and one replicate for L210V. RESP: restrained electrostatic potential. **b** Representation of the EMT ligand, with the oxygen atoms marked in the same colors as in (A) and labeled with their respective names. The oxygen atoms involved in forming the ester bonds are O1, O2 and O8.



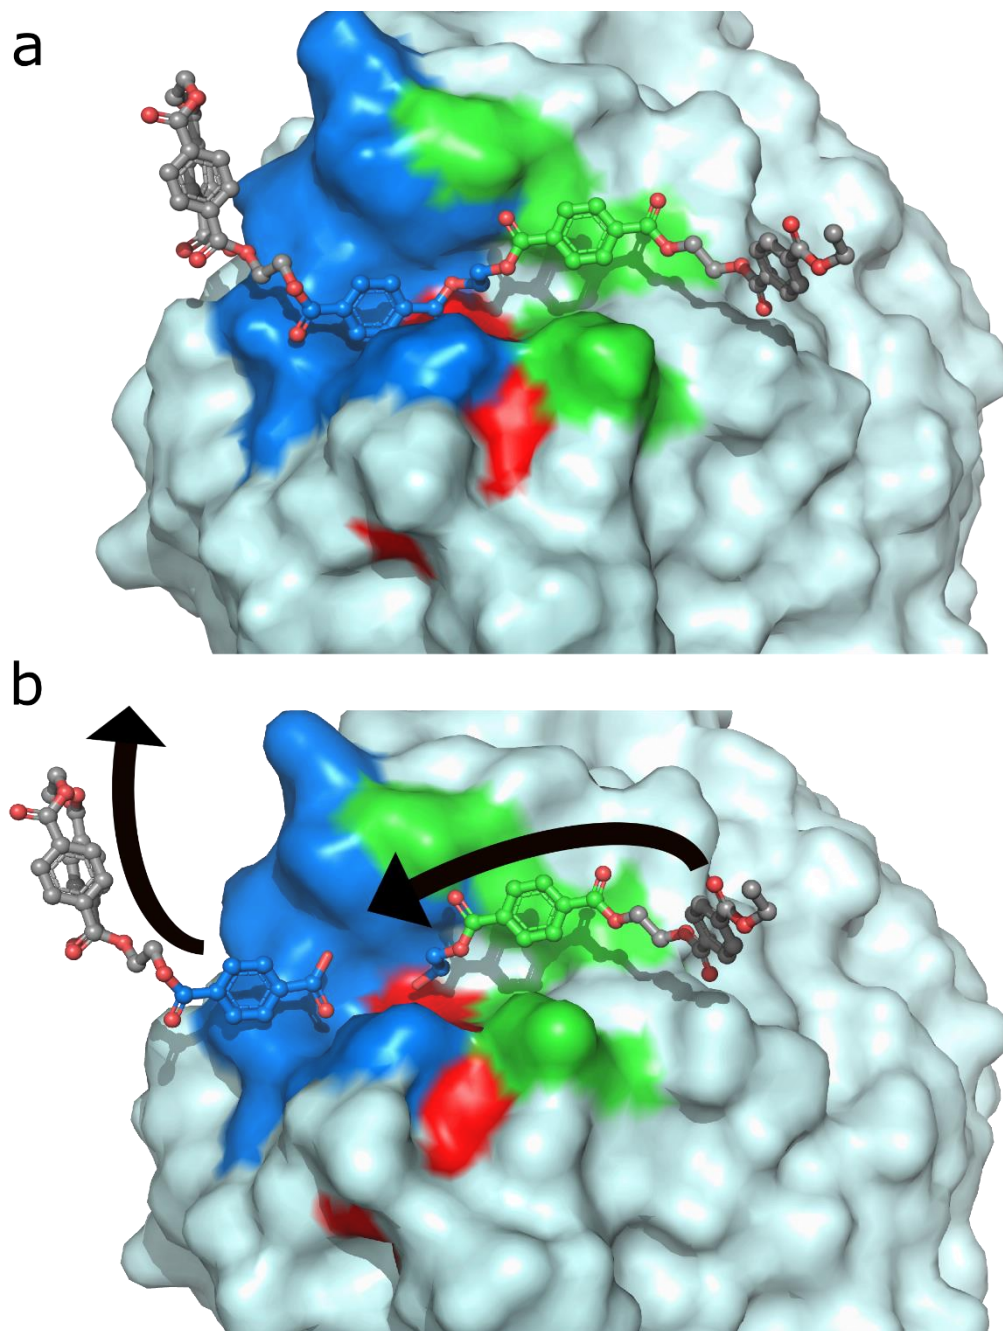

**Supplementary Figure 12.** Predicted binding mode of PHL7 with 2-HE(MHET)<sub>4</sub> generated using the DiffDock deep learning model. PHL7 is represented as surface model and the catalytic triad (red), subsite I (blue) and subsite II (green) are colored. The 2-HE(MHET)<sub>4</sub> is represented as sticks and sphere model. Residues of the ligand that are expected to interact with the enzyme are colored according to the respective subsite. **a** A binding mode is proposed for the 2-hydroxyethyl-(monohydroxyethyl terephthalate)<sub>4</sub>, (2-HE(MHET)<sub>4</sub>) ligand. **b** The proposed product after catalytic cleavage and a depiction of the hypothesized relative movement of the PET chains (indicated by black arrows) are shown.

## References

1. Tian, C. *et al.* ff19SB: Amino-Acid-Specific Protein Backbone Parameters Trained against Quantum Mechanics Energy Surfaces in Solution. *Journal of chemical theory and computation* **16**, 528–552 (2020).
2. Wang, J., Wolf, R. M., Caldwell, J. W., Kollman, P. A. & Case, D. A. Development and testing of a general amber force field. *J Comput Chem* **25**, 1157–1174 (2004).
3. Anandakrishnan, R., Aguilar, B. & Onufriev, A. V. H++ 3.0: automating pK prediction and the preparation of biomolecular structures for atomistic molecular modeling and simulations. *Nucleic Acids Res* **40**, W537-41 (2012).
4. Ryckaert, J.-P., Ciccotti, G. & Berendsen, H. J. Numerical integration of the cartesian equations of motion of a system with constraints: molecular dynamics of n-alkanes. *Journal of Computational Physics* **23**, 327–341 (1977).
5. Darden, T., York, D. & Pedersen, L. Particle mesh Ewald: An  $N \cdot \log(N)$  method for Ewald sums in large systems. *J Chem Phys* **98**, 10089–10092 (1993).
6. Wang, J., Wang, W., Kollman, P. A. & Case, D. A. Automatic atom type and bond type perception in molecular mechanical calculations. *Journal of molecular graphics & modelling* **25**, 247–260 (2006).
7. David A Case *et al.* Amber 2022, 2022.
8. Michaud-Agrawal, N., Denning, E. J., Woolf, T. B. & Beckstein, O. MDAAnalysis: a toolkit for the analysis of molecular dynamics simulations. *J Comput Chem* **32**, 2319–2327 (2011).
9. Engelberger, F., Galaz-Davison, P., Bravo, G., Rivera, M. & Ramírez-Sarmiento, C. A. Developing and Implementing Cloud-Based Tutorials That Combine Bioinformatics Software, Interactive Coding, and Visualization Exercises for Distance Learning on Structural Bioinformatics. *J. Chem. Educ.* **98**, 1801–1807 (2021).
10. Trott, O. & Olson, A. J. AutoDock Vina: improving the speed and accuracy of docking with a new scoring function, efficient optimization, and multithreading. *J Comput Chem* **31**, 455–461 (2010).
11. Eberhardt, J., Santos-Martins, D., Tillack, A. F. & Forli, S. AutoDock Vina 1.2.0: New Docking Methods, Expanded Force Field, and Python Bindings. *J Chem Inf Model* **61**, 3891–3898 (2021).
12. Corso, G., Stärk, H., Jing, B., Barzilay, R. & Jaakkola, T. DiffDock: Diffusion Steps, Twists, and Turns for Molecular Docking, preprint at <https://arxiv.org/pdf/2210.01776> (2022).
13. Lin, Z. *et al.* Evolutionary-scale prediction of atomic level protein structure with a language model, preprint at <https://doi.org/10.1101/2022.07.20.500902> (2022).
14. Sonnendecker, C. *et al.* Low Carbon Footprint Recycling of Post-Consumer PET Plastic with a Metagenomic Polyester Hydrolase. *ChemSusChem* (2021).
15. Frank, R., Krinke, D., Sonnendecker, C., Zimmermann, W. & Jahnke, H.-G. Real-Time Noninvasive Analysis of Biocatalytic PET Degradation. *ACS Catal* **12**, 25–35 (2022).

16. Joo, S. *et al.* Structural insight into molecular mechanism of poly(ethylene terephthalate) degradation. *Nat Commun* **9**, 382 (2018).
17. Tournier, V. *et al.* An engineered PET depolymerase to break down and recycle plastic bottles. *Nature* **580**, 216–219 (2020).
18. Chen, C.-C. *et al.* General features to enhance enzymatic activity of poly(ethylene terephthalate) hydrolysis. *Nat Catal* **4**, 425–430 (2021).
19. Roth, C. *et al.* Structural and functional studies on a thermostable polyethylene terephthalate degrading hydrolase from *Thermobifida fusca*. *Appl Microbiol Biotechnol* **98**, 7815–7823 (2014).
20. Guo, B. *et al.* Conformational Selection in Biocatalytic Plastic Degradation by PETase. *ACS Catal* **12**, 3397–3409 (2022).
